# Supplementary material for: Satellite Retrieval of Microwave Land Surface Emissivity under Clear and Cloudy Skies in China Using Observations from AMSR-E and MODIS
Source: MDPI journal article supplement (doi:10.3390/rs13193980), 2021-10-05
Supplement: s1 [file s1]

**Satellite Retrieval of Microwave Land Surface Emissivity under Clear and Cloudy Skies in China using Observations from AMSR-E and MODIS**

Jiheng Hu<sup>1</sup>, Yuyun Fu<sup>1,2</sup>, Peng Zhang<sup>3</sup>, Qilong Min<sup>4</sup>, Zongting Gao<sup>5</sup>, Shengli Wu<sup>3</sup>, Rui Li<sup>1,2,6,7,\*</sup>

<sup>1</sup> School of Earth and Space Sciences, University of Science and Technology of China, Hefei, 230026, China

<sup>2</sup> Institut de recherche sur les forêts, Université du Québec en Abitibi-Témiscamingue (UQAT), Rouyn-Noranda, J9X 5E4, Canada

<sup>3</sup> National Satellite Meteorological Center of China Meteorological Administration, Beijing, 100044, China

<sup>4</sup> Atmospheric Science Research Center, State University of New York, Albany, 12203, USA

<sup>5</sup> Institute of Meteorological Sciences of Jilin Province, Jilin Provincial Key Laboratory of Changbai Mountain Meteorology & Climate Change, Laboratory of Research for Middle-High Latitude Circulation and East Asian Monsoon, Changchun, 130062, China

<sup>6</sup> Comparative Planetary Excellence Innovation Center, Chinese Academy of Sciences, Hefei, 230026, China

<sup>7</sup> State Key Laboratory of Fire Science, University of Science and Technology of China, Hefei, 230026, China

*Correspondence to:* Rui Li (rli7@ustc.edu.cn)

**Table S1.** Statistical metrics of comparison of our MLSE with Norouzi\_MLSE in China during winter (DJF) in 2003.

**Table S2.** Statistical metrics of comparison of MLSE between MLSE\_Res2 and Moncet\_MLSE in China during winter (DJF) in 2003.

**Figure S1.** The same as Figure 7, but for the comparisons during winter (DJF) in 2003.

**Figure S2.** same as Figure 8, but for the comparisons during winter (DJF) in 2003.

**Figure S3.** Distributions of seasonal (summer, 2003) mean surface skin temperatures from (a) ERA-20C reanalysis, (b) ISCCP-DX estimations, (c) MODS/Aqua satellite LST observations, along with the differences between ISCCP, MODIS and ERA SKTs. All samples are collected at the visiting time of Aqua flight.

**Figure S4.** Comparisons of the brightness temperatures at the top of atmosphere (TB<sub>TOA</sub>) from AE\_L2A version 2 and version 3 on April 26<sup>th</sup>, 2008.

## Supplementary tables and figures

**Table S1.** Statistical metrics of comparison of our MLSE with Norouzi\_MLSE in China during winter (DJF) in 2003.

| Frequency<br>(GHz) | Horizontal Polarizations |        |        |       | Vertical Polarizations |        |        |       |
|--------------------|--------------------------|--------|--------|-------|------------------------|--------|--------|-------|
|                    | 6.925H                   | 10.65H | 18.7H  | 36.5H | 6.925V                 | 10.65V | 18.7V  | 36.5V |
| Samples            | 15827                    | 15827  | 15827  | 15827 | 15827                  | 15827  | 15827  | 15827 |
| R                  | 0.942                    | 0.933  | 0.907  | 0.810 | 0.799                  | 0.772  | 0.708  | 0.671 |
| RMSE               | 0.019                    | 0.020  | 0.022  | 0.032 | 0.018                  | 0.019  | 0.020  | 0.024 |
| MB                 | -0.008                   | -0.003 | -0.007 | 0.006 | -0.006                 | -0.001 | -0.001 | 0.013 |
| MAE                | 0.017                    | 0.015  | 0.018  | 0.023 | 0.015                  | 0.014  | 0.015  | 0.021 |

**Table S2.** Statistical metrics of comparison of MLSE between MLSE\_Res2 and Moncet\_MLSE in China during winter (DJF) in 2003.

| Frequency<br>(GHz) | Horizontal Polarizations |       |       | Vertical Polarizations |       |       |
|--------------------|--------------------------|-------|-------|------------------------|-------|-------|
|                    | 10.65H                   | 18.7H | 36.5H | 10.65V                 | 18.7V | 36.5V |
| Samples            | 15763                    | 15763 | 15763 | 15763                  | 15763 | 15763 |
| R                  | 0.926                    | 0.926 | 0.928 | 0.842                  | 0.826 | 0.841 |
| RMSE               | 0.022                    | 0.021 | 0.021 | 0.018                  | 0.018 | 0.019 |
| MB                 | 0.019                    | 0.012 | 0.021 | 0.018                  | 0.013 | 0.021 |
| MAE                | 0.022                    | 0.018 | 0.023 | 0.021                  | 0.018 | 0.023 |

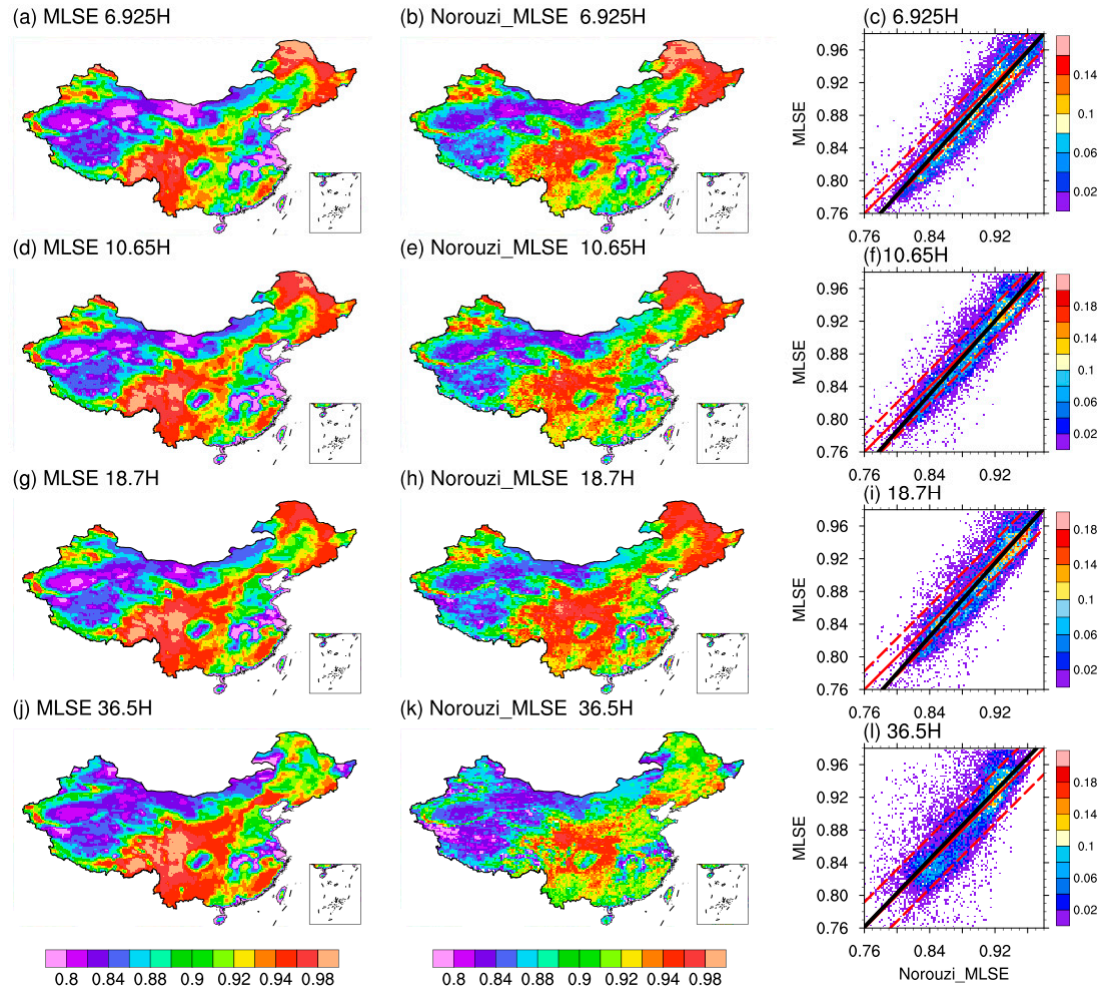

**Figure S1.** The same as Figure 7, but for the comparisons during winter (DJF) in 2003.

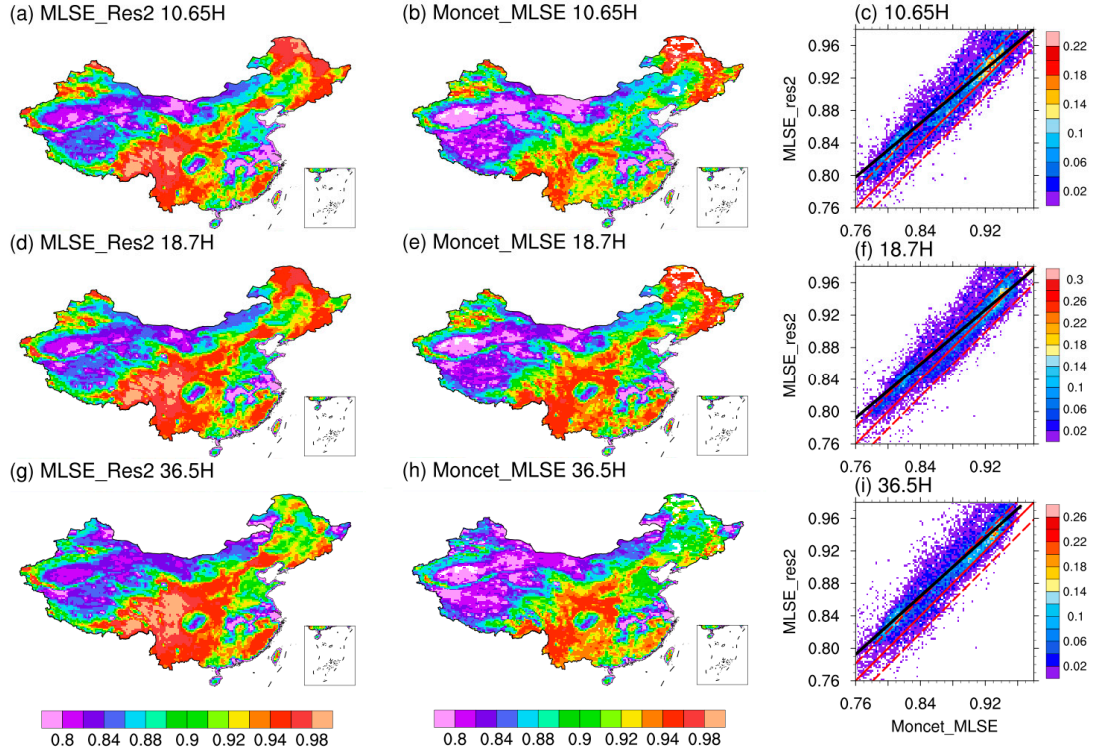

**Figure S2.** same as Figure 8, but for the comparisons during winter (DJF) in 2003.

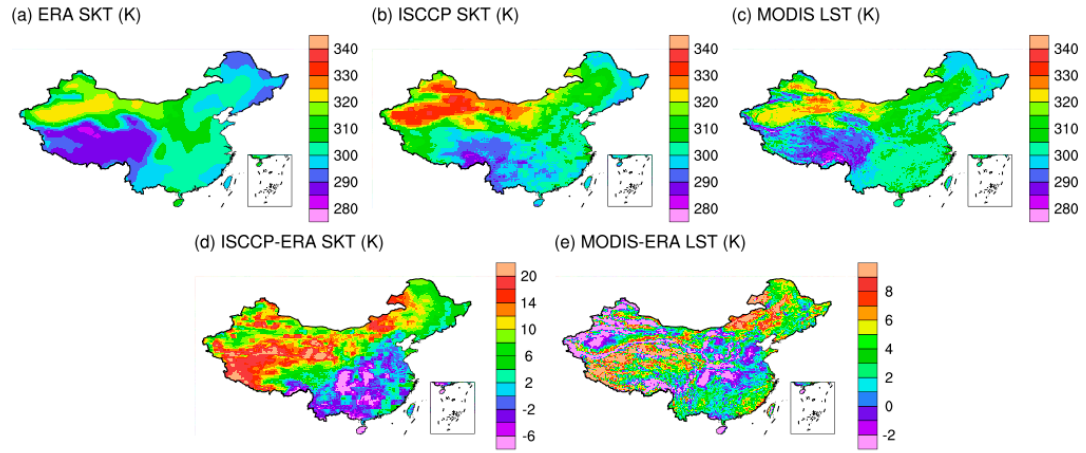

**Figure S3.** Distributions of seasonal (summer, 2003) mean surface skin temperatures from (a) ERA-20C reanalysis, (b) ISCCP-DX estimations, (c) MODIS/Aqua satellite LST observations, along with the differences between ISCCP, MODIS and ERA SKTs. All samples are collected at the visiting time of Aqua flight.

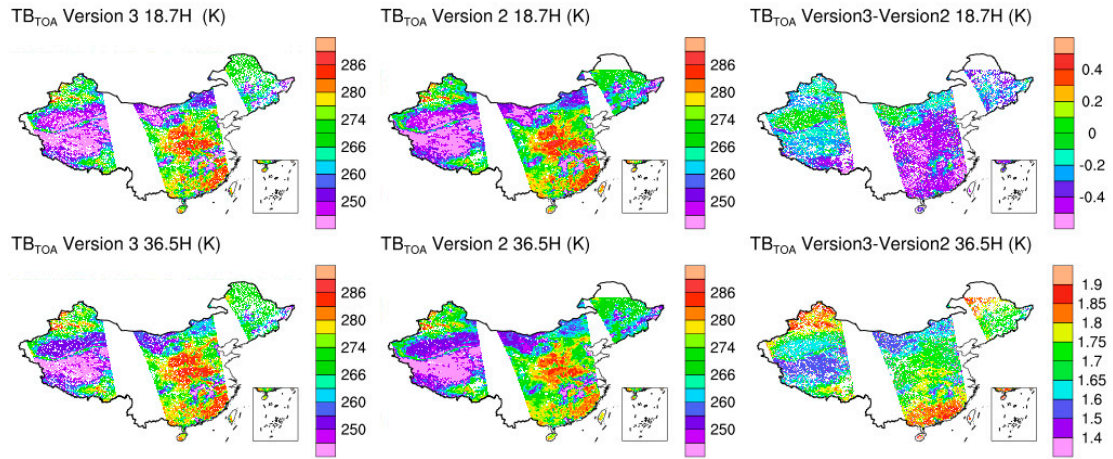

**Figure S4.** Comparisons of the brightness temperatures at the top of atmosphere (TB<sub>TOA</sub>) from AE\_L2A version 2 and version 3 on April 26<sup>th</sup>, 2008.
